# Supplementary material
Source: PubMed Central journal article supplement (PMC5705466)
Supplement: NIHMS884506-supplement-1.pdf [file NIHMS884506-supplement-1.pdf]

# Counting trees in Random Forests: Predicting symptom severity in psychiatric intake reports - Supplementary

---

---

## **1. Complete results on positive valence severity prediction - iteration over parameters**

An overview of results is shown in Table 1. This table shows the individual results for all feature sets with differing parameters. In the first row, experiments  
5 are performed with the basic featureset. In the second row, all context cues (family, uncertainty and negation cues) are added. In the third row, we also add bootstrapping and outlier detection.

|                                                       | Development phase (10-fold CV) |                 | Testing phase |              |
|-------------------------------------------------------|--------------------------------|-----------------|---------------|--------------|
| System                                                | MAE                            | F-score         | MAE           | F-score      |
| Random Baseline                                       | 50.96 (SD 5.32)                | 24.44 (SD 5.26) | 57.28         | 30.90        |
| Bag of words                                          | 74.65 (SD 5.05)                | 43.53 (SD 9.15) | 75.91         | 54.31        |
| Bag of UMLS concepts                                  | 72.76 (SD 4.42)                | 42.88 (SD 7.95) | 72.88         | 47.37        |
| DSM+1                                                 | 74.34 (SD 4.27)                | 46.97 (SD 7.43) | 75.17         | 51.47        |
| DSM+2                                                 | 71.9 (SD 3.46)                 | 40.51 (SD 4.84) | 76.82         | 55.21        |
| DSM                                                   | 67.5 (SD 3.91)                 | 38.79 (SD 8.25) | 70.36         | 46.93        |
| SNOMED+1                                              | 72.31 (SD 4.37)                | 43.66 (SD 7.62) | 77.7          | 58.35        |
| SNOMED                                                | 72.86 (SD 3.69)                | 47.06 (SD 5.93) | 76.4          | 55.44        |
| <b>Added context cues</b>                             |                                |                 |               |              |
| Bag of words                                          | 76.42 (SD 4.22)                | 53.0 (SD 8.42)  | 78.98         | 59.18        |
| Bag of UMLS concepts                                  | 75.49 (SD 3.73)                | 51.21 (SD 8.6)  | 79.41         | 62.42        |
| <b>DSM+1</b>                                          | 78.3 (SD 2.65)                 | 57.05 (SD 4.58) | <b>79.52</b>  | <b>61.15</b> |
| DSM+2                                                 | 76.81 (SD 3.73)                | 53.62 (SD 5.52) | 79.78         | 61.09        |
| DSM                                                   | 72.82 (SD 3.22)                | 47.13 (SD 6.32) | 71.91         | 49.95        |
| SNOMED+1                                              | 75.97 (SD 3.5)                 | 52.69 (SD 6.06) | 79.73         | 61.38        |
| SNOMED                                                | 74.7 (SD 3.05)                 | 51.12 (SD 5.4)  | 75.99         | 56.24        |
| <b>Added Context, Bootstrap and Outlier Detection</b> |                                |                 |               |              |
| Bag of words                                          | 74.1 (SD 3.81)                 | 51.4 (SD 5.45)  | 79.11         | 58.48        |
| Bag of UMLS concepts                                  | 74.37 (SD 2.19)                | 50.01 (SD 4.75) | 78.51         | 58.82        |
| <b>DSM+1</b>                                          | 78.77 (SD 3.61)                | 56.7 (SD 6.66)  | <b>80.64</b>  | <b>63.67</b> |
| DSM+2                                                 | 76.18 (SD 4.06)                | 52.44 (SD 6.81) | 79.2          | 60.37        |
| DSM                                                   | 73.3 (SD 3.72)                 | 48.89 (SD 6.52) | 72.53         | 50.78        |
| SNOMED+1                                              | 74.28 (SD 3.57)                | 48.32 (SD 6.3)  | 79.18         | 60.51        |
| SNOMED                                                | 73.55 (SD 3.17)                | 47.37 (SD 6.05) | 75.8          | 56.91        |
| <b>Differing Systems</b>                              |                                |                 |               |              |
| <b>Questionsets</b>                                   | 78.01% (SD 2.63)               | 53.57 (SD 5.24) | <b>79.34</b>  | <b>60.46</b> |

Table 1: Results achieved (in %) when iterating over the different parameters, i.e. context, and outlier detection and bootstrapping. Models submitted to the challenge are marked in **bold**.
